# Supplementary material for: Monitoring HPV Prevalence and Risk Cofactors for Abnormal Cytology in the Post-Vaccination Period among Croatian Women
Source: MDPI journal article supplement (doi:10.3390/v16040642), 2024-04-20
Supplement: s1 [file s1]

**Supplementary Table S1.** Demographic information of the study population (N = 321)

| <b>Variable</b>             |                            | <b>General Hospital<br/>Zabok (N=170)</b> | <b>Special Hospital Sveta<br/>Katarina (N=151)</b> | <b>Total (N=321)</b> |
|-----------------------------|----------------------------|-------------------------------------------|----------------------------------------------------|----------------------|
| Patient age                 | Median (IQR) <sup>1</sup>  | 39 (29-48)                                | 34 (29-39)                                         | 37 (29-43)           |
|                             | Mean $\pm$ SD <sup>2</sup> | 40 $\pm$ 13.1                             | 34.3 $\pm$ 7.8                                     | 37.3 $\pm$ 11.3      |
|                             | Range (Min-Max)            | 19 - 77                                   | 18 - 64                                            | 18 - 77              |
| Age groups                  | 18-30                      | 49 (28.8)                                 | 47 (31.1)                                          | 96 (29.9)            |
|                             | 31-45                      | 67 (39.4)                                 | 94 (62.3)                                          | 161 (50.2)           |
|                             | 46+                        | 54 (31.8)                                 | 10 (6.6)                                           | 64 (19.9)            |
| Smoking history             | Non smoker                 | 122 (71.8)                                | 105 (69.5)                                         | 227 (70.7)           |
|                             | Smoker                     | 38 (22.4)                                 | 44 (29.1)                                          | 82 (25.5)            |
|                             | 1-5 /day                   | 8 (4.7)                                   | 15 (9.9)                                           | 23 (7.2)             |
|                             | 6-10 /day                  | 19 (11.2)                                 | 9 (6)                                              | 28 (8.7)             |
|                             | 11-20 /day                 | 11 (6.5)                                  | 20 (13.2)                                          | 31 (9.7)             |
|                             | not reported               | 10 (5.9)                                  | 2 (1.3)                                            | 12 (3.7)             |
|                             |                            |                                           |                                                    |                      |
| Parity                      | Nuliparous                 | 51 (30)                                   | 76 (50.3)                                          | 127 (39.6)           |
|                             | 1-2                        | 94 (55.3)                                 | 71 (47)                                            | 165 (51.4)           |
|                             | 3+                         | 25 (14.7)                                 | 4 (2.6)                                            | 29 (9)               |
| History of abortion         |                            | 27 (15.9)                                 | 23 (15.2)                                          | 50 (15.6)            |
| Cancer history <sup>3</sup> |                            | 47 (27.6)                                 | 77 (51)                                            | 124 (38.6)           |
| Cytology                    | Normal                     | 72 (42.4)                                 | 131 (86.8)                                         | 203 (63.2)           |
|                             | Abnormal                   | 98 (57.6)                                 | 20 (13.2)                                          | 118 (36.8)           |
|                             | ASC/AGC-US                 | 29 (17.1)                                 | 4 (2.6)                                            | 33 (10.3)            |
|                             | LSIL                       | 37 (21.8)                                 | 11 (7.3)                                           | 48 (15)              |
|                             | HSIL                       | 32 (18.8)                                 | 5 (3.3)                                            | 37 (11.5)            |

<sup>1</sup>IQR-interquartile range, age data was not following normal distribution; <sup>2</sup>SD-standard deviation; <sup>3</sup>personal or family history of cancer

**Supplementary Table S2.** Comparison of HPV types in pre- (1999–2015) and post- vaccination periods (2020–2023) across different cytology result groups.

|         | Normal    |           | ASCUS      |           | LSIL       |           | HSIL       |           | Total       |            |
|---------|-----------|-----------|------------|-----------|------------|-----------|------------|-----------|-------------|------------|
|         | Pre       | Post      | Pre        | Post      | Pre        | Post      | Pre        | Post      | Pre         | Post       |
| Total N | 72        | 203       | 1029       | 33        | 1310       | 48        | 1246       | 37        | 3657        | 321        |
| Any     | 15 (20.8) | 67 (33)   | 517 (50.2) | 12 (36.4) | 745 (56.9) | 37 (77.1) | 980 (78.7) | 31 (83.8) | 2257 (61.7) | 147 (45.8) |
| X       | 6 (8.3)   | 31 (15.3) | 156 (15.2) | 7 (21.2)  | 285 (21.8) | 23 (47.9) | 243 (19.5) | 10 (27)   | 690 (18.9)  | 71 (22.1)  |
| 6/11    | 1 (1.4)   | 3 (1.5)   | 72 (7)     | 0 (0)     | 111 (8.5)  | 1 (2.1)   | 101 (8.1)  | 2 (5.4)   | 285 (7.8)   | 6 (1.9)    |
| HR      | 8 (11.1)  | 34 (16.7) | 322 (31.3) | 5 (15.2)  | 390 (29.8) | 13 (27.1) | 692 (55.5) | 19 (51.4) | 1412 (38.6) | 71 (22.1)  |
| 16      | 5 (6.9)   | 18 (8.9)  | 159 (15.5) | 3 (9.1)   | 188 (14.4) | 7 (14.6)  | 415 (33.3) | 12 (32.4) | 767 (21)    | 40 (12.5)  |
| 18      | 0 (0)     | 2 (1)     | 32 (3.1)   | 0 (0)     | 47 (3.6)   | 1 (2.1)   | 71 (5.7)   | 1 (2.7)   | 150 (4.1)   | 4 (1.2)    |
| 31      | 1 (1.4)   | 4 (2)     | 90 (8.7)   | 1 (3)     | 83 (6.3)   | 0 (0)     | 166 (13.3) | 2 (5.4)   | 340 (9.3)   | 7 (2.2)    |
| 33      | 0 (0)     | 1 (0.5)   | 41 (4)     | 1 (3)     | 29 (2.2)   | 0 (0)     | 54 (4.3)   | 4 (10.8)  | 124 (3.4)   | 6 (1.9)    |
| 45      | 1 (1.4)   | 4 (2)     | 14 (1.4)   | 1 (3)     | 27 (2.1)   | 2 (4.2)   | 38 (3)     | 0 (0)     | 80 (2.2)    | 7 (2.2)    |
| 52      | 2 (0)     | 6 (1)     | 51 (5)     | 2 (6.1)   | 61 (4.7)   | 3 (6.3)   | 85 (6.8)   | 3 (8.1)   | 199 (5.4)   | 14 (4.4)   |
| 58      | 0 (0)     | 2 (1)     | 30 (2.9)   | 0 (0)     | 40 (3.1)   | 1 (2.1)   | 60 (4.8)   | 0 (0)     | 130 (3.6)   | 3 (0.9)    |

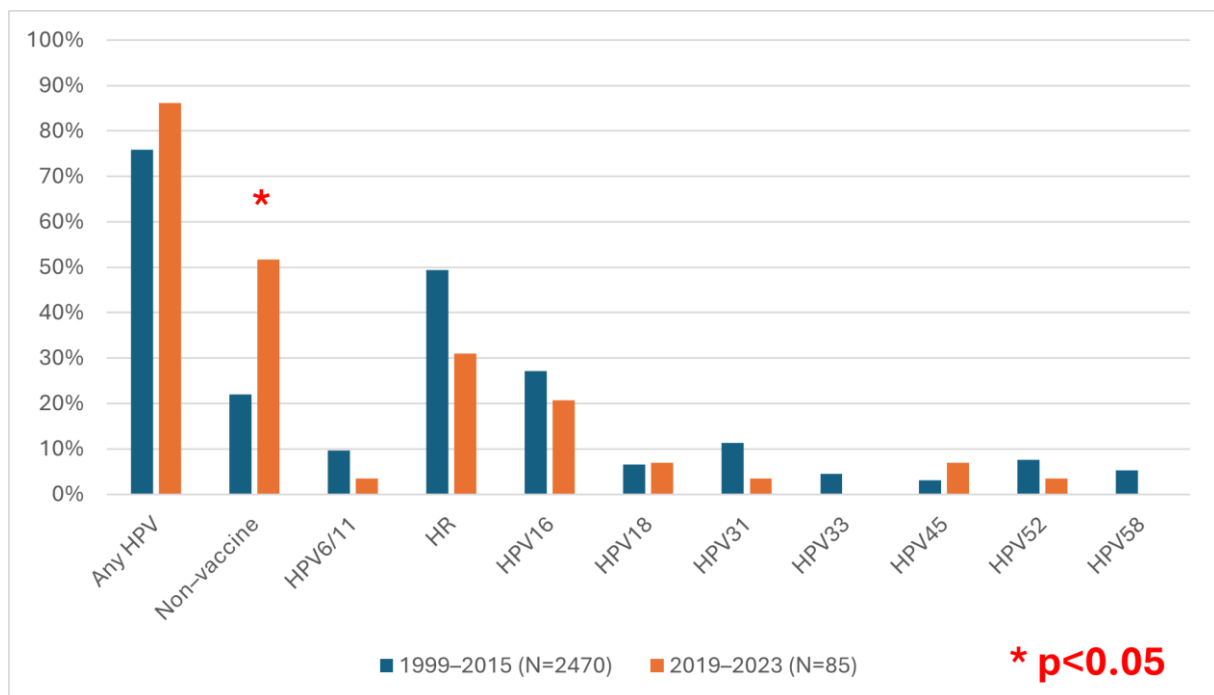

**Supplementary Figure S1.** Comparison of HPV prevalence in low-grade squamous intraepithelial lesion (LSIL) or worse cases during the pre- or post-vaccination period in Croatia in young women (18–30 years). Non-vaccine types, PCR positive with consensus but negative with type-specific primers (i.e., none of HPV types 6/11, 16, 18, 31, 33, 45, 52, or 58).
